# Supplementary material for: Glycophenotypic Alterations Induced by Pteridium aquilinum in Mice Gastric Mucosa: Synergistic Effect with Helicobacter pylori Infection
Source: PubMed Central journal article supplement (PMC3374793; doi:10.1371/journal.pone.0038353), 2012-06-13
Supplement: pone.0038353.s002.pdf [file pone.0038353.s002.pdf]

Table S1

|                                                                      | Animal | Weeks | Inflammation<br>(Sidney classification) | Tn | STn | T | ST | SLe <sup>a</sup> | SLe <sup>x</sup> |
|----------------------------------------------------------------------|--------|-------|-----------------------------------------|----|-----|---|----|------------------|------------------|
| Group 1 - Control                                                    | 1.1    | 4     | Absent                                  | +  | -   | + | -  | -                | +                |
|                                                                      | 1.2    | 4     | Absent                                  | +  | -   | + | -  | -                | +                |
|                                                                      | 1.3    | 4     | Absent                                  | +  | -   | + | -  | -                | +                |
|                                                                      | 1.5    | 7     | Absent                                  | +  | -   | + | -  | -                | +                |
|                                                                      | 1.6    | 7     | Absent                                  | +  | -   | + | -  | -                | +                |
|                                                                      | 1.7    | 7     | Absent                                  | +  | -   | + | -  | -                | +                |
|                                                                      | 1.8    | 7     | Absent                                  | +  | -   | + | -  | -                | +                |
| Group 2 - <i>Pteridium aquilinum</i>                                 | 2.1    | 4     | Mild                                    | +  | -   | + | +  | -                | ++               |
|                                                                      | 2.2    | 4     | Mild                                    | +  | -   | + | -  | -                | +                |
|                                                                      | 2.3    | 4     | Mild                                    | ++ | -   | + | +  | -                | ++               |
|                                                                      | 2.4    | 4     | Mild                                    | ++ | -   | + | +  | -                | ++               |
|                                                                      | 2.5    | 7     | Mild                                    | ++ | -   | + | -  | -                | +                |
|                                                                      | 2.6    | 7     | Mild                                    | ++ | -   | + | +  | -                | ++               |
|                                                                      | 2.7    | 7     | Mild                                    | +  | -   | + | +  | -                | ++               |
|                                                                      | 2.8    | 7     | Mild                                    | ++ | -   | + | +  | -                | ++               |
| Group 3 - <i>Helicobacter pylori</i>                                 | 3.1    | 4     | Moderate                                |    |     |   |    | -                | +                |
|                                                                      | 3.2    | 4     | Moderate                                | +  | -   | + | -  | -                | +                |
|                                                                      | 3.3    | 4     | Mild                                    | +  | -   | + | -  | -                | +                |
|                                                                      | 3.4    | 4     | Moderate                                |    |     |   |    | -                | ++               |
|                                                                      | 3.5    | 7     | Mild                                    | +  | -   | + | -  | -                | +                |
|                                                                      | 3.6    | 7     | Moderate                                | +  | -   | + | -  | -                | ++               |
|                                                                      | 3.7    | 7     | Mild                                    |    |     |   |    |                  |                  |
|                                                                      | 3.8    | 7     | Moderate                                | ++ | -   | + | -  | -                | ++               |
| Group 4 - <i>Pteridium aquilinum</i> +<br><i>Helicobacter pylori</i> | 4.1    | 4     | Severe                                  | ++ | -   | + | -  | -                | ++               |
|                                                                      | 4.2    | 4     | Severe                                  |    |     |   |    | -                | ++               |
|                                                                      | 4.3    | 4     | Severe                                  |    |     |   |    |                  |                  |
|                                                                      | 4.4    | 4     | Severe                                  |    |     |   |    | -                | ++               |
|                                                                      | 4.5    | 7     | Severe                                  | ++ | -   | + | -  | -                | ++               |
|                                                                      | 4.6    | 7     | Severe                                  | ++ | -   | + | +  | -                | ++               |
|                                                                      | 4.7    | 7     | Severe                                  | ++ | -   | + | +  | -                | ++               |
|                                                                      | 4.8    | 7     | Severe                                  | ++ | -   | + | +  | -                | ++               |
