# Supplementary material for: Glycophenotypic Alterations Induced by Pteridium aquilinum in Mice Gastric Mucosa: Synergistic Effect with Helicobacter pylori Infection
Source: PubMed Central journal article supplement (PMC3374793; doi:10.1371/journal.pone.0038353), 2012-06-13
Supplement: pone.0038353.s003.pdf [file pone.0038353.s003.pdf]

Table S2

| Gene name                                                                                                                    | Accession no.  | Fold difference    | p value  |
|------------------------------------------------------------------------------------------------------------------------------|----------------|--------------------|----------|
|                                                                                                                              |                | Group 2 vs Group 1 |          |
| <b>Glycan biosynthesis, modification, and degradation</b>                                                                    |                |                    |          |
| Glycoprotein                                                                                                                 |                |                    |          |
| AHSG – Alpha-2-HS-glycoprotein                                                                                               | NM_013465.1    | 2.00               | 0.066924 |
| Proteoglycan                                                                                                                 |                |                    |          |
| COL14A1 – Collagen, type XIV, ALPHA 1                                                                                        | uc007vse.1     | 1.42               | 0.042605 |
| DCN – decorin                                                                                                                | NM_007833.4    | 2.21               | 0.042605 |
| GPC1 – glypican 1                                                                                                            | NM_016696.4    | 2.22               | 0.025752 |
| GPC3 – glypican 3                                                                                                            | NM_016697.2    | 1.47               | 0.008916 |
| GPC6 – glypican 6                                                                                                            | NM_011821.2    | 1.33               | 0.066924 |
| Glycan-transferase                                                                                                           |                |                    |          |
| ST3GAL2 – ST3 beta-galactoside alpha-2,3-sialyltransferase 2                                                                 | uc009nlk.1     | 1.42               | 0.091279 |
| ST6GALNAC6 – ST6 (alpha-N-acetyl-neuraminyl-2,3-beta-galactosyl-1,3)-N-acetylgalactosaminidine alpha-2,6-sialyltransferase 6 | NM_016973.2    | 1.33               | 0.025752 |
| GALNTL4 – UDP-N-acetyl-alpha-D-galactosamine:polypeptide N-acetylgalactosaminyltransferase-like 4                            | NM_173739.3    | 1.36               | 0.089129 |
| WBSCR17 – Williams-Beuren syndrome chromosome region 17 or Galnt17                                                           | NM_145218.3    | 1.45               | 0.025752 |
| CIGALT1 – core 1 synthase, glycoprotein-N-acetylgalactosamine 3-beta-galactosyltransferase, 1                                | NM_052993.2    | - 1.44             | 0.025752 |
| DSEL – dermatan sulfate epimerase-like                                                                                       | NM_001081316.1 | 1.37               | 0.057607 |
| Glycan degradation                                                                                                           |                |                    |          |
| SULF1 – sulfatase 1                                                                                                          | NM_172294.1    | 1.57               | 0.035948 |
| NEU2 – sialidase 2 (cytosolic sialidase)                                                                                     | NM_015750.2    | 1.97               | 0.027935 |
| GLB1 – galactosidase, beta 1                                                                                                 | NM_009752.1    | - 1.47             | 0.074119 |
| Sulfotransferase                                                                                                             |                |                    |          |
| SULT1A1 – sulfotransferase family, cytosolic, 1A, phenol-preferring, member 1                                                | NM_133670.1    | 1.62               | 0.049073 |
| <b>Inflammation and host immune response</b>                                                                                 |                |                    |          |
| Chemokines                                                                                                                   |                |                    |          |
| CCL21 – chemokine (C-C motif) ligand 21b (serine)                                                                            | NM_011124.4    | 1.93               | 0.042605 |
| CCRL1 – chemokine (C-C motif) receptor-like 1                                                                                | NM_145700.1    | 1.35               | 0.042605 |
| Interleukins and receptors                                                                                                   |                |                    |          |
| IL6ST – interleukin 6 signal transducer (gp130, oncostatin M receptor)                                                       | NM_010560.2    | 1.47               | 0.052724 |
| C-type lectin                                                                                                                |                |                    |          |
| CD248 – CD248 molecule, endosialin                                                                                           | NM_054042.2    | 1.35               | 0.072165 |
| MGL2 – macrophage galactose N-acetyl-galactosamine specific lectin 2                                                         | NM_145137.2    | 1.41               | 0.089129 |
| <b>Signaling pathways and cell-cell signaling</b>                                                                            |                |                    |          |
| Growth factors and receptors                                                                                                 |                |                    |          |
| ANGPL2 – angiopoetin-like 2                                                                                                  | NM_011923.4    | 1.67               | 0,035948 |
| ANGPTL3 – angiopoetin-like 3                                                                                                 | NM_013913.3    | 1.87               | 0,091122 |
| NOG – noggin                                                                                                                 | NM_008711.2    | 1.38               | 0,035948 |
| TGFB3 – transforming growth factor, beta 3                                                                                   | NM_009368.2    | 1.83               | 0,027935 |
| WNT4 – wingless-type MMTV integration site family, member 4                                                                  | NM_009523.1    | 1.81               | 0,079129 |
| FZD2 – frizzled homolog 2 (Drosophila)                                                                                       | NM_020510.2    | 1.75               | 0,035948 |
| FZD7 – frizzled homolog 7 (Drosophila)                                                                                       | NM_008057.3    | 2.38               | 0,027935 |
| FGFR2 – fibroblast growth factor receptor 2                                                                                  | NM_010207.2    | 1.59               | 0,088258 |
| FGF13 – fibroblast growth factor 13                                                                                          | NM_010200.2    | 1.68               | 0,042605 |
| IGF2 – insulin-like growth factor 2 (somatomedin A)                                                                          | NM_010514.2    | 1.55               | 0,056767 |
| IGFBP4 – insulin like growth factor binding protein 4                                                                        | NM_010517.3    | 1.94               | 0,042605 |
| IGFBP5 – insulin like growth factor binding protein 5                                                                        | NM_010518.2    | 2.36               | 0,035948 |
| IGFBP6 – insulin like growth factor binding protein 6                                                                        | NM_008344.2    | 2,26               | 0,042605 |
| BMP3 – bone morphogenetic protein 3                                                                                          | NM_173404.2    | 1.44               | 0,066924 |
| FIGF – c-fos induced growth factor (vascular endothelial growth factor D)                                                    | NM_010216.1    | 1.45               | 0,056767 |
| IHH – Indian hedgehog homolog (Drosophila)                                                                                   | NM_010544.2    | - 1,39             | 0,042605 |
| Adhesion molecule                                                                                                            |                |                    |          |
| CD34                                                                                                                         | NM_133654.3    | 1.85               | 0,042605 |
| PODXL2 – podocalyxin-like 2                                                                                                  | NM_176973.3    | 1.30               | 0,066924 |
| Nucleotide sugar                                                                                                             |                |                    |          |
| PGM5 – Phosphoglucomutase 5                                                                                                  | NM_175013.2    | 2.65               | 0,049073 |
