# Supplementary material for: Glycophenotypic Alterations Induced by Pteridium aquilinum in Mice Gastric Mucosa: Synergistic Effect with Helicobacter pylori Infection
Source: PubMed Central journal article supplement (PMC3374793; doi:10.1371/journal.pone.0038353), 2012-06-13
Supplement: pone.0038353.s004.pdf [file pone.0038353.s004.pdf]

Table S3

| Gene name                                                                        | Accession no. | Fold difference | p value  |
|----------------------------------------------------------------------------------|---------------|-----------------|----------|
| <b>Glycan biosynthesis, modification, and degradation</b>                        |               |                 |          |
| Glycoprotein                                                                     |               |                 |          |
| MUC13 – mucin 13, cell surface associated                                        | NM_010739.2   | 3,36            | 0,046789 |
| Proteoglycan                                                                     |               |                 |          |
| CD74 – CD74 molecule, major histocompatibility complex, class II invariant chain | NM_010545.3   | 3,05            | 0,059556 |
| Glycan-transferase                                                               |               |                 |          |
| CHST8 – carbohydrate (N-acetylglucosamine 4-0) sulfotransferase 8                | NM_175140.3   | - 1,31          | 0,059556 |
| B3GALT1 – UDP-Gal:betaGlcNAc beta 1,3-galactosyltransferase, polypeptide 1       | NM_020283.2   | - 1,36          | 0,054537 |
| FUT4 – fucosyltransferase 4 (alpha (1,3) fucosyltransferase, myeloid-specific)   | NM_010242.3   | 1,91            | 0,067756 |
| Sulfotransferase                                                                 |               |                 |          |
| SULT1B1 – sulfotransferase family, cytosolic, 1B, member 1                       | NM_019878.4   | 1,74            | 0,059556 |
| <b>Inflammation and host immune response</b>                                     |               |                 |          |
| Chemokines                                                                       |               |                 |          |
| CCL5 – chemokine (C-C motif) ligand 5                                            | uc007kpi.1    | 2,89            | 0,059556 |
| CXCR6 – chemokine (C-X-C motif) receptor 6                                       | NM_030712.4   | 1,63            | 0,066649 |
| CXCL6 – chemokine (C-X-C motif) ligand 6 (granulocyte chemotactic protein 2)     | NM_009141.2   | 1,60            | 0,054537 |
| CCL20 – chemokine (C-C motif) ligand 20                                          | NM_016960.1   | 1,64            | 0,067756 |
|                                                                                  | uc007bsm.1    | 1,46            | 0,059556 |
| C-type lectin                                                                    |               |                 |          |
| KLRA9 – killer cell lectin-like receptor subfamily A, member 9                   | NM_010651.3   | - 1,86          | 0,012733 |
| SFTPD – surfactant protein D                                                     | NM_009160.1   | 2,50            | 0,006935 |
| <b>Signaling pathways and cell-cell signaling</b>                                |               |                 |          |
| Growth factors and receptors                                                     |               |                 |          |
| FZD3 – frizzled homolog 3 (Drosophila)                                           | NM_021458.1   | - 1,36          | 0,054537 |
| Adhesion molecule                                                                |               |                 |          |
| PODXL2 – podocalyxin-like 2                                                      | NM_176973.3   | - 1,35          | 0,066649 |
| Nucleotide sugar                                                                 |               |                 |          |
| SLC35F2 – solute carrier family 35, member F2                                    | NM_028060.3   | 1,90            | 0,054537 |
